# Supplementary material for: Identification of Anoikis-Related Subgroups and Prognosis Model in Liver Hepatocellular Carcinoma
Source: Int J Mol Sci. 2023 Feb 2;24(3):2862. doi: 10.3390/ijms24032862 (PMC9918018; doi:10.3390/ijms24032862)
Supplement: Supplementary file 1 [file ijms-24-02862-s001.zip]

Archive with 8 entries (8 files):
- Supplementary Figure 1.tif
- Supplementary Figure 2.tif
- Supplementary Figure 3.tif
- Supplementary Figure 4.tif
- Supplementary Figure 5.tif
- Supplementary Figure 6.tif
- Supplementary Figure 7.tif
- Supplementary material.pdf
